# Supplementary material for: Identification of Potential Leukocyte Biomarkers Related to Drug Recovery of CFTR: Clinical Applications in Cystic Fibrosis
Source: MDPI journal article supplement (doi:10.3390/ijms22083928), 2021-04-10

**A** CF77 VTX TREATED vs UNTREATED

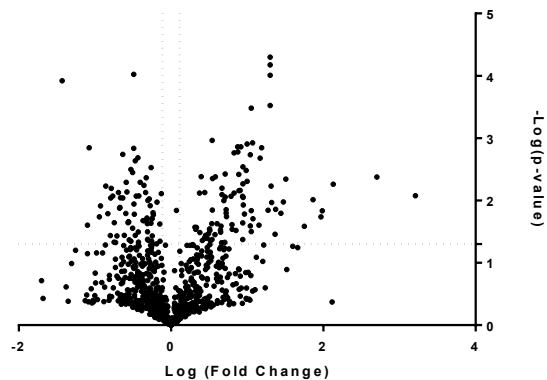

**B** CF130 VTX TREATED vs UNTREATED

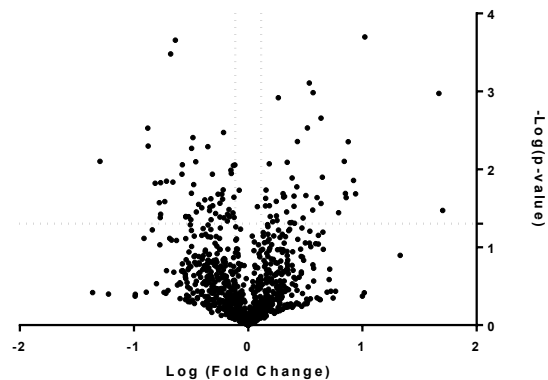

**C** CF135 VTX TREATED vs UNTREATED

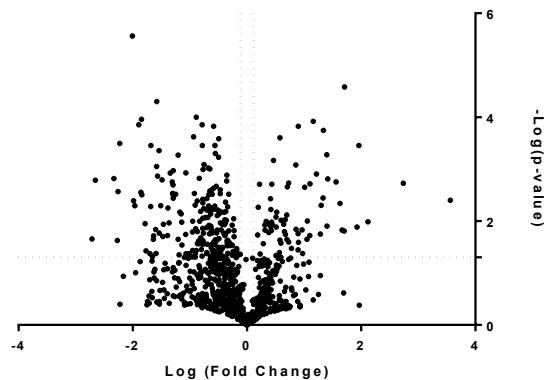

**D** CF138 VTX TREATED vs UNTREATED

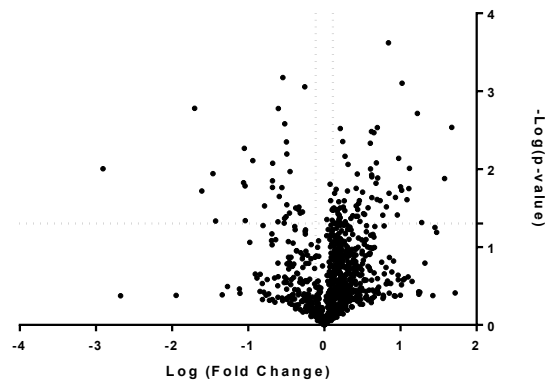

Supplement: s1 [file s1]
